# Supplementary material for: A core–shell structured AuNPs@ZnCo-MOF SERS substrate for sensitive and selective detection of thiram
Source: Royal Society of Chemistry journal article supplement (doi:10.1039/d4ay00164h), 2024-01-01
Supplement: d4ay00164h1.pdf [file d4ay00164h1.pdf]

## Supplementary Material

**Core-shell structured AuNPs@ZnCo-MOFs SERS substrate for sensitive and selective detection of thiram**

**Wenxia Xue, Jihong Fu\*, Yaxue Zhang, Shuxian Ren, Guoqi  
Liu**

*<sup>a</sup>Key Laboratory of Oil and Gas Fine Chemicals Ministry of Education & Xinjiang Uyghur Autonomous Region, School of Chemical Engineering and Technology, Xinjiang University, Urumqi 830017, Xinjiang, China.*

*<sup>b</sup>Corresponding author: Jihong Fu. Phone: +86 991 8582966. Email: fjh.518@163.com*



## 1. The calculation the EF of AuNPs@ZnCo MOFs substrate

Enhancement factor (EF) is a significant index used for evaluating the Raman sensitivity of a SERS substrate. Here, the SERS EF value of AuNPs@ZnCo MOFs substrate was calculated by utilizing the formulas based on the previous method reported. The specific equation is listed as follows:

$$EF = \left( \frac{I_{SERS}}{I_{NR}} \right) \left( \frac{C_{NR}}{C_{SERS}} \right)$$
$$EF = \left( \frac{5213.86}{148.632} \right) \times \left( \frac{0.1 M}{1 \times 10^{-6} M} \right) = 3.51 \times 10^6$$

Where  $I_{SERS}$  represents the SERS intensity of 4-ATP on the AuNPs@ZnCo MOFs substrate,  $I_{NR}$  represents the control Raman intensity of 4-ATP. And  $C_{SERS}$  ( $1.0 \times 10^{-6} \text{ mol} \cdot \text{L}^{-1}$ ) and  $C_{NR}$  ( $0.1 \text{ mol} \cdot \text{L}^{-1}$ ) are the corresponding concentrations of 4-ATP used for SERS and control Raman tests, respectively. Finally, the EF value of AuNPs@ZnCo MOFs substrate calculated is about  $3.51 \times 10^6$ . These results confirm that our prepared AuNPs@ZnCo MOFs SERS substrate has acceptable SERS activity.
